# Supplementary material for: Identification of phenolic secondary metabolites from Schotia brachypetala Sond. (Fabaceae) and demonstration of their antioxidant activities in Caenorhabditis elegans
Source: PeerJ. 2016 Nov 15;4:e2404. doi: 10.7717/peerj.2404 (PMC5119267; doi:10.7717/peerj.2404)
Supplement: Data S1 — Tables of raw data in collected table for reviewer [file peerj-04-2404-s001.xlsx]

## Sheet: DPPH
1st	[µM]	Inhibition %
	0.2	94.9619	94.3787	94.5731
	0.1	95.5451	96.1283	96.1283
	0.05	95.7395	95.3507	95.7395
	0.025	79.7991	78.4384	79.4103
	0.0125	49.6679	48.3071	50.2511
	0.0063	31.7836	32.3668	31.7836
	0.0031	20.3143	19.1479	21.0919
	0.0016	16.0376	16.232	16.0376
	0.0008	10.0113	10.0113	11.9553
	0.0004	10.7889	10.4001	9.81695
	0.0002	7.28981	6.70662	8.84497
	0.0001	6.12344	7.09542	7.6786
2nd	0.2	95.0814	95.0814	94.8931
	0.1	95.8345	96.211	95.6462
	0.05	94.7048	96.211	96.0227
	0.025	73.8065	75.1244	77.1954
	0.0125	47.8248	48.7661	51.0254
	0.0063	30.1271	32.1981	34.2691
	0.0031	17.701	19.019	22.4079
	0.0016	15.8183	13.9356	17.3245
	0.0008	11.4889	10.9001	10.817
	0.0004	10.7889	10.4001	9.81695
	0.0002	8.28981	6.70354	8.84337
3rd	0.2	93.7898	94.6997	93.6078
	0.1	95.6096	96.8835	95.4277
	0.05	96.1556	95.9736	94.8817
	0.025	82.3248	81.051	82.3248
	0.0125	57.5751	55.9372	57.5751
	0.0063	37.9208	38.8308	38.4668
	0.0031	25.9099	25.7279	27.1838
	0.0016	19.1765	18.8126	18.8126
	0.0008	11.7241	10.0123	12.3079
	0.0004	11.7889	8.42601	9.81695
	0.0002	8.28981	6.70354	6.26334

## Sheet: ABTS
	[µg/ml]	Trolox					[mg/ml]	Interpolated X values			ABTS Values
	20	0.087	0.123	0.079
	10	0.296	0.331	0.286		1st	0.125	136.107			1088.86
	5	0.387	0.402	0.404		2nd	0.125	131.107			1048.86
	2.5	0.448	0.447	0.446		3rd	0.125	130.721			1045.77
	1.25	0.463	0.467	0.461		4th	0.125	129.367			1034.94		1054.6	<--	Average
	0.625	0.478	0.472	0.479
	Equation	Y = -0.01961*X + 0.4929

## Sheet: FRAP
	[uM]	FeSO4					[mg/ml]	Interpolated X values			FRAP Values
	75	0.889	0.852	0.779
	37.5	0.479	0.457	0.491		1st	0.125	602.107			4816.86
	18.75	0.3	0.295	0.298		2nd	0.125	591.211			4729.69
	9.375	0.194	0.2	0.196		3rd	0.125	684.005			5472.04		5006.19	<--	Average
	4.6875	0.139	0.137	0.136
	2.34375	0.118	0.13	0.112
	1.17188	0.101	0.114	0.095
	Equation	Y = 0.009955*X + 0.09844

## Sheet: Survival
		SBE 50ug/ml	SBE 100ug/ml	SBE 150ug/ml	Control
% Survival	1st	10	31	45	12
	2nd	11	36	40	9
	3rd	13	35	44	11

## Sheet: ROS Accumulation
	Pixel Intensity
	SBE 50 ug	SBE 100 ug	SBE 150 ug	Control
1st	1121	782	364	1665
	1068	555	564	1276
	826	1115	397	1616
	1420	838	462	1581
	1530	1070	442	1822
	1045	1250	320	1119
	1368	976	315	1390
	1102	560	322	1348
	804	1213	348	1377
	1262	585	500	1727
	979	639	532	1524
	658	874	325	1199
	1117	1151	304	1559
	1008	1159	426	1011
	1032	1138	398	1795
	1404	866	372	1203
	1030	1259	366	1083
	1232	1051	331	1084
	1330	1032	462	1817
	713	789	460
2nd	1527	307	468	1665
	1166	1053	400	1276
	1312	767	421	1616
	1015	805	532	1581
	1117	755	325	1822
	1404	1002	367	1119
	1010	1146	349	1390
	1231	1212	365	1199
	1320	879	349	1377
	1420	838	321	1727
	1232	1138	520	1524
	1231	878	516	1348
	1232	1249	423	1559
	1117	1052	456	1011
	989	996	411	1895
	1020	960	320	1803
	415	1113	335	1013
	1369	595		1084
	1157	689		1997
	989			1931
3rd	798	400	486	1666
	747	998	403	1665
	1045	983	416	1614
	1368	703	399	1623
	1323	749	301	1562
	1313	1002	501	1123
	1053	1046	532	1313
	800	1014	365	1245
	1007	833	302	1378
	1032	879	396	1598
	1404	1140	521	1717
	1030	878	499	1044
	1017	1221	444	1396
	1008	1049	418	1555
	1032	999	400	1895
	1304	963	327	1813
	1032	1123	315	1011
		603	300	1233
		789		1999
		404		1983

## Sheet: HSP-16.2
	Pixel Intensity
	SBE 50 ug	SBE 100 ug	SBE 150 ug	Control
1st	50743.9	49304.1	20057.7	59202.8
	55319	44966.9	30547.5	53220.4
	55786.5	36425.7	27605.2	53881.9
	57854.9	38360.8	21201	57090.8
	59426.7	44918.7	24636.9	55656.4
	51967.6	44703	21876.8	59405.6
	55480.3	46773.1	21770.9	62411.5
	62173.3	46960	24136.9	58705.4
	57412.8	42401.1	26487.8	49256.9
	51094.5	30393.8	24148	52387.3
	60507.7	44296.7	16956.8	52145
	60438.4	49498.5	23684.9	38371.6
	60050.7	42976.4	23465.2	44395.4
	52984.8	43359.3	12703.3	52900.4
	59476.6	42436.7	25828.7	49895.3
	48956.8	34401	24463.6	59565.7
	50519.4	42113.6	23915.1	49818.3
	60927.9	43728.2	21788.1	53099.7
2nd	45516.1	50936.7	10445.4	55660.5
	50234.9	47939.2	20971.6	53265.4
	45449.8	49096.1	22426.4	51747.4
	38555.9	48334.3	43351.8	48553.5
	35915.4	40439.5	13583.5	54755.9
	42664.3	37748.3	41317.8	59131.6
	44297.4	41403.5	13596.1	61304.5
	38929.4	45645.3	31823	58709.9
	56894.7	55292.6	42345.8	57548.5
	40070.5	32296.7	42302.1	52469.7
	42236.4	41126.2	27170.5	52357.9
	46481.9	40772	32530.7	59142.1
	52147.7	30775.8	43414.8	57143.3
	45025.9	34347.5	46470.4	49576.1
	42035.4	40816.5	39400.2	55788.7
	47684.5	22366.2	51606.7	60840
	39746.9	42204.7	39226.2	52586.8
3rd	33556.2	36534	39245.2	57137.9
	53195.5	51735.7	20476.7	48943.2
	45715.7	25192.6	14690.4	54552.1
	44715.7	43971.2	22726.4	62842.1
	44725.7	27492.1	36274.6	58138.2
	43195.5	43038.3	54782.2	56594.1
	38929.4	19287.6	18651.6	53968
	40071.6	39642.4	29041.7	56082.3
	60507.7	41046.6	17171.2	58635
	60500.9	21641.7	22314	47378.3
	60120.4	28087.4	23184.5	50084.3
	61120	42741.4	29368.4	53821.8
	56888.7	42614.5	22095.2	55127.8
	55887.8	21641.6	9776.75	62759
	38919.5	40046.2	18651.6	60106.8
	45115.1	41641.1	29041.7	54211.8
	37719.6	44171	17171.2	59594.1
		34534	22414	58794.1
			23224.5	50994
			25668.4	62884.2

## Sheet: DAF-16
		%
1st		Cytosolic	Intermediate	Nuclear
	SBE 50 g/ml	40	30	30
	SBE 100 g/ml	15	15	70
	SBE 150 g/ml	5	20	75
	Untreated Control	83	12	5
		%
2nd		Cytosolic	Intermediate	Nuclear
	SBE 50 g/ml	47	23	30
	SBE 100 g/ml	15	17	68
	SBE 150 g/ml	7	20	73
	Untreated Control	83	10	7
		%
3rd		Cytosolic	Intermediate	Nuclear
	SBE 50 g/ml	44	19	37
	SBE 100 g/ml	17	17	66
	SBE 150 g/ml	5	19	76
	Untreated Control	80	17	3
