# Supplementary material for: Identification of phenolic secondary metabolites from Schotia brachypetala Sond. (Fabaceae) and demonstration of their antioxidant activities in Caenorhabditis elegans
Source: PeerJ journal article supplement (doi:10.7717/peerj.2404), 2016-11-15

myrecitin-3-O- $\alpha$ -L-<sup>1</sup>C<sub>4</sub>-rhamnoside

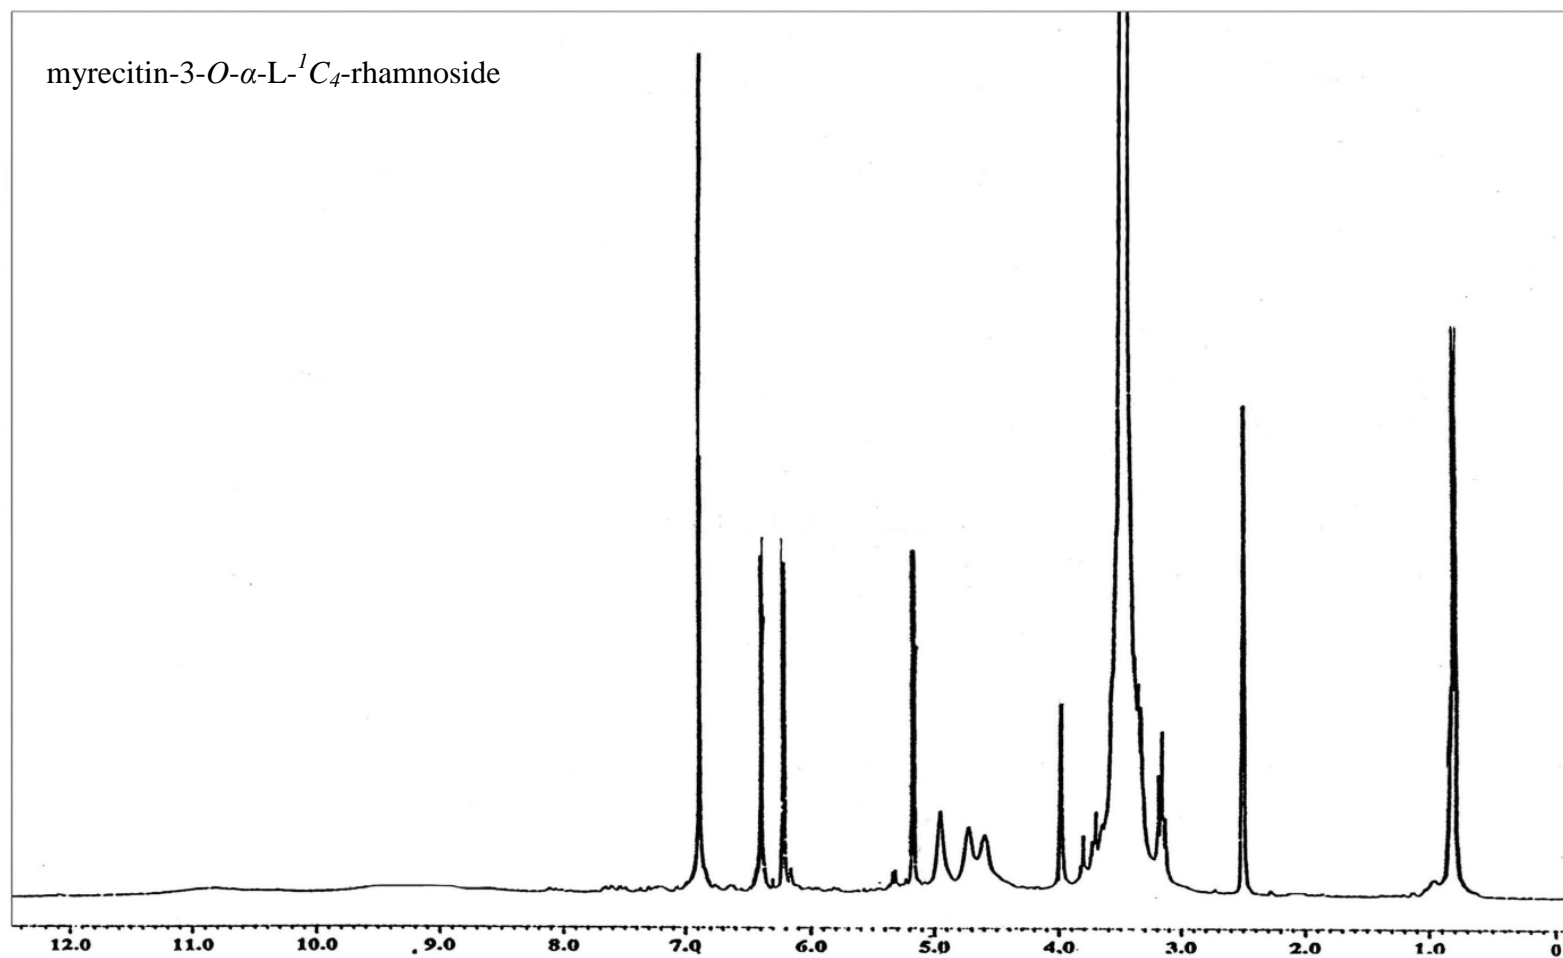

Supplement: HNMR_of_compound_1.pdf [file HNMR_of_compound_1.pdf]
